# Supplementary material
Source: bioRxiv or medRxiv preprint supplement (https://www.biorxiv.org/highwire/filestream/26969/field_highwire_adjunct_files/3/095349-12.pdf)
Supplement: Supplementary file [file 095349-12.pdf]

| Top promoter[SNPs in top promoter]                    | Linkage | Corrected coexpression score | FDR  |
|-------------------------------------------------------|---------|------------------------------|------|
| p@chr1:11905830..11905839,- [rs5068]                  |         | 0.54                         | 0.09 |
| enhancer@chr11:10350347-10350728 [rs7129220]          |         | 0.46                         | 0.09 |
| p@chr11:16916978..16916996,- [rs11024074]             |         | 0.44                         | 0.09 |
| p@chr5:32829061..32829092,+ [rs7733331]               |         | 0.37                         | 0.19 |
| p@chr10:75409754..75409787,- [rs9664184, rs12247028]  |         | 0.27                         | 0.34 |
| p14@CSK [rs2168519, rs8033381]                        |         | 0.18                         | 0.48 |
| p@chr10:104905957..104905982,- [rs11191580]           |         | 0.17                         | 0.48 |
| enhancer@chr20:57740587-57741260 [rs6026742]          |         | 0.12                         | 0.57 |
| p@chr10:104591351..104591362,+ [rs17115100]           |         | 0.09                         | 0.65 |
| p@chr17:43195790..43195798,- [rs3744760]              |         | 0.06                         | 0.69 |
| p@chr12:90090838..90090842,- [rs11105378, rs12230074] |         | 0.02                         | 0.79 |
| p5@FURIN [rs4932178]                                  |         | 0.02                         | 0.79 |
| enhancer@chr10:104769429-104769711 [rs11191511]       |         | 0.0                          | 1.0  |
